RESEARCH ARTICLE

# Muscle Recruitment and Coordination following Constraint-Induced Movement Therapy with Electrical Stimulation on Children with Hemiplegic Cerebral Palsy: A Randomized Controlled Trial

Kaishou Xu<sup>1\*</sup>, Lu He<sup>1</sup>, Jianning Mai<sup>2</sup>, Xiaohua Yan<sup>1</sup>, Ying Chen<sup>1</sup>

**1** Department of Rehabilitation, Guangzhou Women and Children's Medical Center, Guangzhou Medical University, Guangzhou, 510120, China, **2** Department of Neurology, Guangzhou Women and Children's Medical Center, Guangzhou Medical University, Guangzhou, 510120, China

\* [xksyi@126.com](mailto:xksyi@126.com)

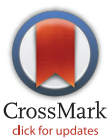

OPEN ACCESS

**Citation:** Xu K, He L, Mai J, Yan X, Chen Y (2015) Muscle Recruitment and Coordination following Constraint-Induced Movement Therapy with Electrical Stimulation on Children with Hemiplegic Cerebral Palsy: A Randomized Controlled Trial. PLoS ONE 10(10): e0138608. doi:10.1371/journal.pone.0138608

**Editor:** Roland Jeroen Vermeulen, MUMC+ Academic Medical Center Maastricht, NETHERLANDS

**Received:** March 9, 2015

**Accepted:** August 30, 2015

**Published:** October 9, 2015

**Copyright:** © 2015 Xu et al. This is an open access article distributed under the terms of the [Creative Commons Attribution License](https://creativecommons.org/licenses/by/4.0/), which permits unrestricted use, distribution, and reproduction in any medium, provided the original author and source are credited.

**Data Availability Statement:** All relevant data are within the paper and its Supporting Information files.

**Funding:** This work was supported by Guangzhou Science Technology and Innovation Commission (HD 2014J4100136, 201508020003), and Guangdong Provincial Department of Science and Technology (HD 2014A020212469), Guangzhou, China. The funders had no role in study design, data collection and analysis, decision to publish, or preparation of the manuscript.

## Abstract

### Objective

To investigate changes of muscle recruitment and coordination following constraint-induced movement therapy, constraint-induced movement therapy plus electrical stimulation, and traditional occupational therapy in treating hand dysfunction.

### Methods

In a randomized, single-blind, controlled trial, children with hemiplegic cerebral palsy were randomly assigned to receive constraint-induced movement therapy (n = 22), constraint-induced movement therapy plus electrical stimulation (n = 23), or traditional occupational therapy (n = 23). Three groups received a 2-week hospital-based intervention and a 6-month home-based exercise program following hospital-based intervention. Constraint-induced movement therapy involved intensive functional training of the involved hand during which the uninvolved hand was constrained. Electrical stimulation was applied on wrist extensors of the involved hand. Traditional occupational therapy involved functional unimanual and bimanual training. All children underwent clinical assessments and surface electromyography (EMG) at baseline, 2 weeks, 3 and 6 months after treatment. Surface myoelectric signals were integrated EMG, root mean square and cocontraction ratio. Clinical measures were grip strength and upper extremity functional test.

### Results

Constraint-induced movement therapy plus electrical stimulation group showed both a greater rate of improvement in integrated EMG of the involved wrist extensors and cocontraction ratio compared to the other two groups at 3 and 6 months, as well as improving in

**Competing Interests:** The authors have declared that no competing interests exist.

root mean square of the involved wrist extensors than traditional occupational therapy group ( $p < 0.05$ ). Positive correlations were found between both upper extremity functional test scores and integrated EMG of the involved wrist as well as grip strength and integrated EMG of the involved wrist extensors ( $p < 0.05$ ).

## Conclusions

Constraint-induced movement therapy plus electrical stimulation is likely to produce the best outcome in improving muscle recruitment and coordination in children with hemiplegic cerebral palsy compared to constraint-induced movement therapy alone or traditional occupational therapy.

## Trial registration

chictr.org [ChiCTR-TRC-13004041](https://www.chictr.org/ChiCTR-TRC-13004041)

## Introduction

Cerebral palsy (CP) refers to a group of permanent disorders that affect the development of movement and posture that occur in the developing fetal or infant brain, leading to activity limitation[1]. Upper limb dysfunction is a common symptom in children with CP, especially in children with hemiplegic CP[2]. In addition, the uninvolved upper limb is usually used in the daily life, leading to the developmental disuse and disregard of the involved extremity, exacerbating the impaired hand dysfunction[3,4]. Due to sensory disturbance, hypertonia and muscle weakness of the involved upper limb, children with hemiplegic CP are impaired in the basic hand function such as grasping, reaching and manipulating[5]. Therefore, the hand dysfunction restricts their activities, participation, and quality of life.

In order to improve the hand function of children with hemiplegic CP, multiple therapeutic strategies with different outcomes have been developed[6–9]. One of them is constraint-induced movement therapy (CIMT) that was developed, proved to be an effective method, to treat children with hemiplegic CP[6–9]. The main principle of CIMT includes constraint of the uninvolved hand and intensive practice with the involved hand during a specified time period. In addition, traditional occupational therapeutic strategies are often applied to improving the hand function in children with hemiplegic CP. Some evidences have demonstrated that CIMT and goal-directed occupational therapy (OT) home programs seem to be superior over standard care in improving upper limb and individualized outcomes[7].

Muscle weakness in children with CP is well documented[5]. Muscle strengthening in children with CP poses a challenge to clinical professionals due to the lack of muscle selectivity necessary for a specific strengthening program. Electrical stimulation has been proposed as a potentially useful modality for the improvement of muscle strength, sensory input, and muscle activation in patients with CP and stroke[10–15]. Therefore, CIMT in combination with electrical stimulation may be an effective alternative to CIMT alone.

Children with CP are characterized by insufficient muscle recruitment and activation consistent with low levels of surface myoelectric signals[16,17]. Braendvik et al[18] also reported that in children with CP, the involved arm had a low level of electromyography (EMG) amplitude and a weak muscle force during the maximum isometric voluntary contraction (MIVC). Surface EMG is a one-dimensional time series signal of biological electrical activity of the

neuromuscular system recorded from the muscle surface. A previous study in which surface EMG was applied indicated that CIMT was effective in increasing the muscle activation in children with CP[19]. However, the efficacy of CIMT on muscle recruitment and activation remains unclear.

Previously, we compared CIMT plus electrical stimulation with CIMT and traditional OT, and examined the efficacy of them in improving hand performance in children with hemiplegic CP over different time frames[15]. Active ROM, grip strength[20], nine-peg hole test[21], upper extremity functional test[22], Peabody developmental motor scales[23], global rating scale[24], and social life ability scale[25] were selected as the outcome measures of the involved hand function, bimanual hand performance, and perceived changes by caregivers across a wide range of ages. While there is evidence to support the use of CIMT, CIMT with electrical stimulation and traditional OT to improve the hand function skills of children with hemiplegic CP, this study seeks to further investigate the underlying mechanism by which changes are made in muscle recruitment and activation.

Therefore, the objective of this study was to investigate the efficacy of muscle recruitment and coordination following CIMT, CIMT plus electrical stimulation and traditional OT in treating hand dysfunction in children with hemiplegic CP using surface EMG, and based on the above investigation, to analyze the relationship between hand function and surface myoelectric signals.

## Methods

### Participants

Children with CP aged 2 to 14 years from the neurology and rehabilitation department of a tertiary medical center were recruited for this study over a 1-year period. The inclusion criteria included a diagnosis of hemiplegic CP, the ability to extend the wrist  $\geq 20^\circ$  and the metacarpophalangeal joint  $10^\circ$  from full flexion, a 20%–80% functional difference between the involved and noninvolved hand, and to comply with study instructions. The exclusion criteria included uncontrolled seizures, severe health problems not typically associated with CP, contractures that limited functional arm and hand use, botulinum toxin injection in the upper limb during the last 6 months or who wished to receive it within the period of study, orthopedic surgery on their involved upper limb, visual and balance problems that would prevent them from carrying out the intervention or assessment. The study was approved by the medical ethical committee of Guangzhou Women and Children's Medical Center and registered with [www.chictr.org](http://www.chictr.org) (trial registration number [ChiCTR-TRC-13004041](https://doi.org/10.1186/1877-7472-13004041)). The written informed consent was obtained from caregivers of all participants.

### Design

This study was a randomized, single-blind, controlled trial (Fig 1). The protocol for this trial and the CONSORT checklist are available as [S1 CONSORT Checklist](#) and [S1 Protocol](#). Based on previous studies of using CIMT and OT on children with hemiplegic CP[6–9,15], we determined to have a power of 80% in statistical test and two-sided  $\alpha = 0.05$  to detect the difference in treatment effect. Assuming an estimated loss to follow-up of 20%, we calculated that we should enroll at least 75 children. All children who participated in the study were randomly divided into three groups: CIMT, CIMT plus electrical stimulation, or OT group. Among the 164 eligible candidates, a total of 68 children with hemiplegic CP (23 in the CIMT plus electrical stimulation group, 22 in the CIMT group, 23 in the OT group) were included in the final analysis. To minimize uneven distribution of known variables, the subjects were allocated in an unbiased manner a random number from computerized method of minimization[26]. The

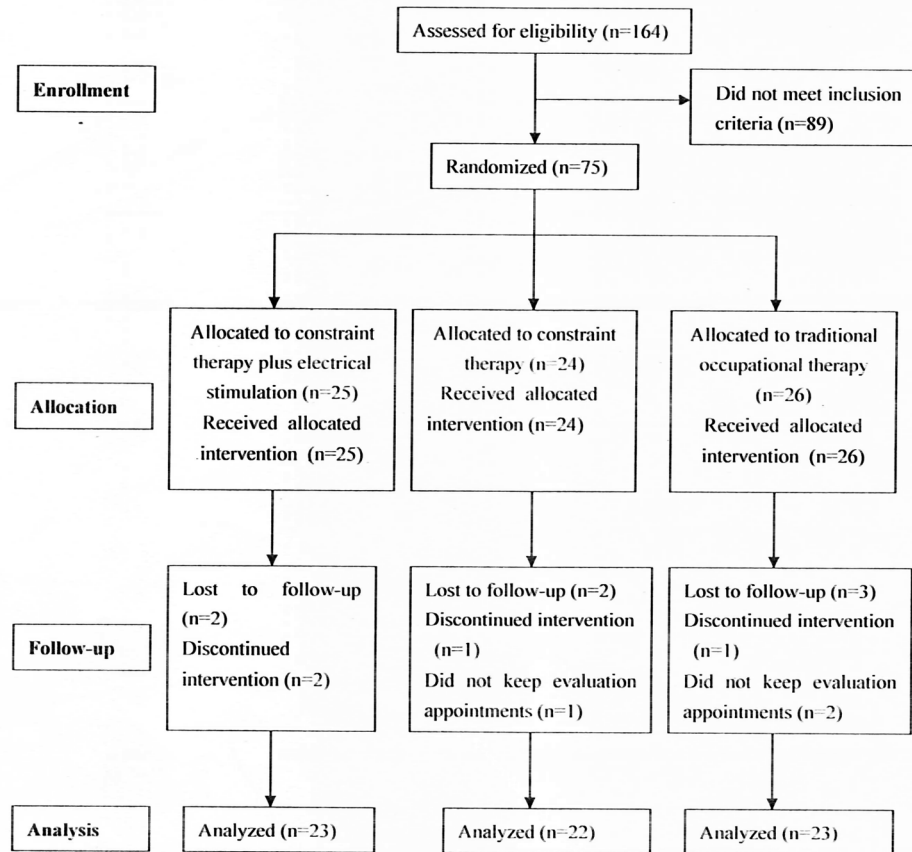

**Fig 1. Intention-to-treat flowchart.**

doi:10.1371/journal.pone.0138608.g001

stratification included age ( $\leq 4$  years and  $> 4$  years) and global rating scale scores[24] ( $\leq 5$  and  $> 5$ ), a measure of involved hand severity created for the parent study of cerebral palsy outcomes. Scores range from 0 to 10.

All children underwent surface EMG analysis (MIVC of hand) and functional measures (clinical outcomes) in the neurology and rehabilitation department at baseline (about 2 weeks before the intervention). Outcome measures were administered by three independent occupational therapists who were not aware of the treatment group of each patient. All children underwent these assessments again at 2 weeks immediately after the hospital-based intervention, and at 3 and 6 months after the start of the intervention. After a 2-week therapist-based intervention at hospital, the intervention program was home-based. Demographic characteristics and functional performance were recorded, including age, gender, the difference between the involved and noninvolved hand on the global rating scale scores, the gross motor function classification system (GMFCS) level[1], and the manual ability classification system (MACS) level[9].

### Interventions

CIMT with orthosis[15] of the uninvolved hand or traditional OT was provided 3 hours a session, 5 days a week for 2 weeks at our hospital. In addition, at the end of the daily therapy, children were dismissed to a 1-hour home-based exercise program, which was extended to 2 hours a day for 6 months following hospital-based intervention. Parents were to complete the activity

logs to monitor compliance. During CIMT, every child received personal instruction from professionals involving the specific practice of designated target movements. Children were engaged in therapeutic functional activities that provided the structured and intensive practice using the involved hand. The difficulty of the activity was increased by changing either temporal or spatial/accuracy task constraints when the target movement was performed successfully. Traditional OT program involved functional unimanual and bimanual training, and consisted of advice and treatment aimed at reducing spasticity, improving hand function and activities of daily life, and the provision of appropriate orthotics. Electrical stimulation was applied for 20 minutes a day, 5 times a week for 2 weeks, on extensors carpi radialis and extensors digitorum of the involved upper limb through a MyoTrac Infiniti dual-channel neuromuscular electrical stimulation unit and reusable carbonized-rubber electrodes. Frequencies were set at 50Hz, pulse rate 30 pulses per second with 300 $\mu$ s of amplitude, and the amplitude to a maximum of 100mA. ON time was set to 12 seconds with 1 second of rise and decay and an OFF time of 12 seconds. Amplitude was increased slowly to the child's tolerance without causing discomfort, and adjusted to induce the muscle contraction for all children. Three certified occupational therapists provided treatments for all the children. They also worked with the caregivers by follow-up telephone calls once every two weeks to monitor whether the home-based exercise program was done daily.

## Outcome measures

**Clinical outcomes.** Clinical outcome measures were hand-grip strength measured with sphygmomanometry[20], upper extremity functional test[22], and global rating scale[24]. The Intraclass Correlation Coefficient was 0.995 for upper extremity functional test, 0.919 for hand-grip strength measured with sphygmomanometry[15].

**Surface EMG.** The muscle recruitment and coordination was assessed with the surface EMG. The Flexcomp Infiniti surface EMG analysis system was used during the assessment phases. Surface electrodes were attached on the skin of wrist flexors and extensors. The uninvolved hand was measured first, followed by the involved one hand. The children were instructed to grip the cylindrically-shaped wood fish with maximum force to antagonize the examiner, aiming to produce MIVC of the wrist extensors and flexors (Fig 2). Each test lasted for 10 seconds followed by 10 seconds of rest, three times in a row.

Root mean square (RMS), Integrated EMG (iEMG), cocontraction ratio (CR) ( $CR = \frac{iEMG \text{ of wrist flexors}}{[iEMG \text{ of wrist extensors} + iEMG \text{ of wrist flexors}] \times 100\%}$ ) during MIVC were recorded and analyzed[27–32]. RMS approaches the quantification of the surface EMG signal by squaring the data, summing the squares, dividing the sum by the number of observations, and finally taking the square root[27–29]. The iEMG reflects the total discharge of motor units involved in movement and the discharge of each unit during a certain time[27–29]. CR could reflect the coordination and activation of agonist and antagonist muscle groups[30–32].

## Statistical analysis

Analysis was performed using IBM SPSS Statistics 20.0. If the values were normally distributed, One-Way ANOVA, repeated measure analysis of variances, analysis of covariance and post-hoc analysis (Bonferroni method) were used. Otherwise, nonparametric tests were used. Kruskal-Wallis test was applied to compare the differences of age and global rating scale scores. Chi-square test was used to compare the differences of gender, affected sides (right or left), GMFCS level, and MACS level among the three groups. One-Way ANOVA was applied to compare the differences of baseline data. Repeated measure analysis of variances was applied to compare the differences of measures before treatment, then at two weeks, three and six

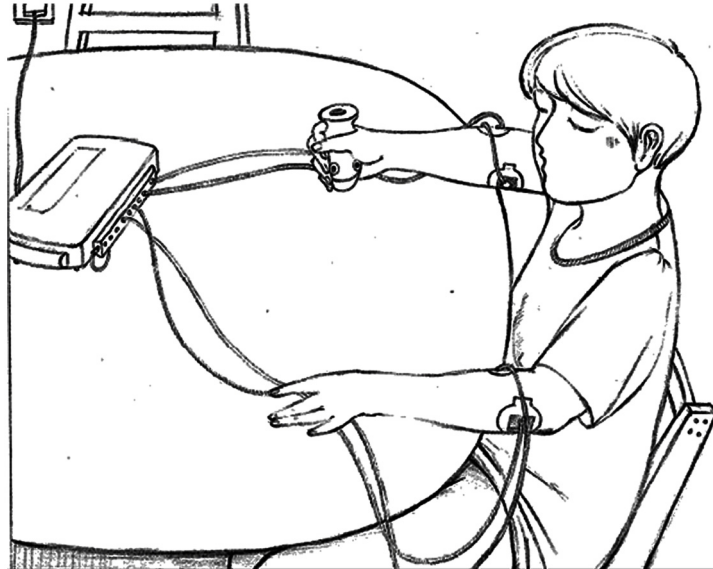

**Fig 2. Test of surface electromyography.**

doi:10.1371/journal.pone.0138608.g002

month intervals after treatment within each group. In order to exclude the effects caused by the different baseline data among the three groups, analysis of covariance was applied to compare the differences in measurements at two weeks, three and six months after treatment among the three groups (the baseline data being covariate). The correlation of surface EMG data and hand function was performed with Pearson correlation analyses. The P-values were 2-sided and considered statistically significant when less than 0.05 level.

## Results

### Demographics and baseline data

No significant differences ( $p > 0.05$ , [Table 1](#)) were found in age, global rating scale scores, gender, affected sides (right or left), GMFCS level, and MACS level among the three groups obtained with Kruskal-Wallis test and Chi-square test, nor in hand-grip strength, upper extremity functional test scores, among the three groups obtained with One-Way ANOVA. Significant differences ( $p < 0.05$ , [Table 1](#)) were found in iEMG of the involved wrist flexor and extensor during the MIVC at baseline among the three groups obtained with One-Way ANOVA. Yet no significant differences ( $p > 0.05$ , [Table 1](#)) were found in other surface EMG data, such as RMS, CR, etc. during the MIVC at baseline among the three groups obtained with One-Way ANOVA.

### Improvement of muscle recruitment and coordination

Compared with the results before the treatment during MIVC of the involved hand, RMS of both hands, iEMG and CR of the involved hand changed significantly after treatment for all the children in two weeks, three and six month respectively, as well as reducing in iEMG of the uninvolved hand was seen after six months of the treatment, obtained with repeated measure analysis of variances ( $p < 0.05$ , [Table 2](#)).

No significant differences were found in RMS and iEMG of the two wrists' flexors and the uninvolved wrist extensors in each follow-up session among the three groups during MIVC of the involved hand, obtained with analysis of covariance ( $p > 0.05$ , [Table 2](#), [Figs 3](#) and [4](#)).



**Table 1. Demographic and baseline data: mean (SD) or n (%).** MIVC, maximum isometric voluntary contraction; RMS, root mean square; iEMG, integrated electromyography.

| Group                                                               | Constraint therapy plus electrical stimulation (n = 23) | Constraint therapy (n = 22) | Occupational therapy (n = 23) | P     |
|---------------------------------------------------------------------|---------------------------------------------------------|-----------------------------|-------------------------------|-------|
| Age (month)                                                         | 56.8(34.0)                                              | 54.6(36.6)                  | 54.7(30.8)                    | 0.850 |
| Male                                                                | 7(30%)                                                  | 7 (32%)                     | 11 (48%)                      | 0.467 |
| Involved hand (right)                                               | 13(57%)                                                 | 10(45%)                     | 15 (63%)                      | 0.409 |
| Gross motor function classification system level I / level II       | 20(87%)/3(13%)                                          | 19(86%)/3(14%)              | 21(91%)/2(9%)                 | 0.852 |
| Manual ability classification system level I / level II / level III | 3(13%)/17(74%)/3(13%)                                   | 4(18%)/16(73%)/2(9%)        | 3(13%)/16(70%)/4(17%)         | 0.125 |
| Global rating scale (involved hand)                                 | 4.6(1.6)                                                | 3.8(1.8)                    | 4.8(1.7)                      | 0.123 |
| Hand-grip strength (mmHg)                                           | 63.7(48.4)                                              | 65.5(56.0)                  | 63.3(47.8)                    | 0.988 |
| Upper extremity functional test                                     | 35.0(22.9)                                              | 29.0(25.0)                  | 37.8(30.5)                    | 0.521 |
| MIVC of involved hand                                               |                                                         |                             |                               |       |
| RMS of involved wrist extensors (μV)                                | 47.9(20.6)                                              | 47.0(16.8)                  | 48.9(26.1)                    | 0.958 |
| RMS of involved wrist flexors (μV)                                  | 55.0(21.6)                                              | 54.3(17.1)                  | 55.1(26.5)                    | 0.992 |
| RMS of uninvolved wrist extensors (μV)                              | 20.7(9.3)                                               | 20.6(14.6)                  | 25.8(21.8)                    | 0.463 |
| RMS of uninvolved wrist flexors (μV)                                | 19.9(9.1)                                               | 21.9(15.2)                  | 22.6(21.4)                    | 0.836 |
| iEMG of involved wrist extensors (μV·s)                             | 911.8(386.4)                                            | 837.8(365.9)                | 614.3(401.0)                  | 0.030 |
| iEMG of involved wrist flexors (μV·s)                               | 1045.0(451.9)                                           | 926.4(391.0)                | 729.4(441.6)                  | 0.049 |
| Cocontraction ratio                                                 | 53.4(4.8)                                               | 52.7(2.2)                   | 54.8(3.5)                     | 0.157 |
| iEMG of uninvolved wrist extensors (μV·s)                           | 284.5(161.6)                                            | 258.2(182.3)                | 243.9(178.0)                  | 0.726 |
| iEMG of uninvolved wrist flexors (μV·s)                             | 272.2(151.4)                                            | 250.0(185.9)                | 235.4(173.0)                  | 0.762 |
| MIVC of uninvolved hand                                             |                                                         |                             |                               |       |
| RMS of involved wrist extensors (μV)                                | 28.4(13.6)                                              | 30.6(17.5)                  | 30.9(12.4)                    | 0.815 |
| RMS of involved wrist flexors (μV)                                  | 35.0(16.8)                                              | 32.7(15.6)                  | 33.7(13.7)                    | 0.880 |
| RMS of uninvolved wrist extensors (μV)                              | 77.5(19.2)                                              | 76.9(22.6)                  | 77.9(24.1)                    | 0.989 |
| RMS of uninvolved wrist flexors (μV)                                | 77.6(17.2)                                              | 77.9(22.8)                  | 79.3(23.7)                    | 0.961 |
| iEMG of involved wrist extensors (μV·s)                             | 595.3(254.1)                                            | 551.6(256.0)                | 570.2(201.5)                  | 0.827 |
| iEMG of involved wrist flexors (μV·s)                               | 602.2(263.1)                                            | 572.9(255.5)                | 579.7(195.7)                  | 0.911 |
| Cocontraction ratio                                                 | 47.9(2.6)                                               | 47.9(2.3)                   | 48.1(1.7)                     | 0.933 |
| iEMG of uninvolved wrist extensors (μV·s)                           | 1447.4(367.2)                                           | 1432.0(636.4)               | 1435.3(550.7)                 | 0.995 |
| iEMG of uninvolved wrist flexors (μV·s)                             | 1319.9(275.1)                                           | 1328.8(588.3)               | 1339.3(537.7)                 | 0.991 |

doi:10.1371/journal.pone.0138608.t001

However, the CIMT plus electrical stimulation group showed both a greater rate of improvement in the iEMG of the involved wrist extensors and CR compared to the OT group and CIMT group at three and six months, as well as improving in RMS of the involved wrist extensors than OT group, obtained with analysis of covariance ( $p < 0.05$ , Figs 3–5).

In comparison with the results before the treatment during MIVC of the uninvolved hand, no significant changes were found in iEMG, RMS and CR measured in intervals of two weeks, three and six month after the treatment for all children obtained with repeated measure analysis of variances ( $p > 0.05$ , Table 3). No significant differences were found in CR, RMS, and iEMG at each follow-up session among the three groups during MIVC of the uninvolved hand, obtained by the covariance analysis ( $p > 0.05$ , Table 3).

### Relationship between surface myoelectric signals and hand function

The mean improvements between baseline and end of follow-up were respectively 10.5 mmHg for grip strength, 11.0 for upper extremity functional test scores, 402.6 and 324.7 μV·s for

**Table 2. Change of root mean square (RMS,  $\mu$ V), integrated electromyography (iEMG,  $\mu$ V·s) and cocontraction ratio on maximum isometric voluntary contraction of involved hand at two weeks, three and six months: mean (SD).**

| Group                              | Constraint therapy plus electrical stimulation (n = 23) | Constraint therapy (n = 22) | Occupational therapy (n = 23) | P     |
|------------------------------------|---------------------------------------------------------|-----------------------------|-------------------------------|-------|
| RMS of involved wrist extensors    |                                                         |                             |                               |       |
| Week 2-baseline                    | 12.8(17.8)                                              | 9.1(9.7)                    | 6.4(8.5)                      | 0.246 |
| Month 3-baseline                   | 21.9(18.9)                                              | 16.8(11.3)                  | 11.7(9.1)                     | 0.049 |
| Month 6-baseline                   | 31.3(21.8)                                              | 24.9(14.6)                  | 17.0(9.0)                     | 0.015 |
| RMS of involved wrist flexors      |                                                         |                             |                               |       |
| Week 2-baseline                    | 6.7(13.8)                                               | 6.6(8.0)                    | 6.8±8.0                       | 0.997 |
| Month 3-baseline                   | 17.3(17.2)                                              | 15.1(9.4)                   | 14.7(10.3)                    | 0.758 |
| Month 6-baseline                   | 27.1(25.0)                                              | 24.2(14.3)                  | 23.2(11.8)                    | 0.751 |
| RMS of uninvolved wrist extensors  |                                                         |                             |                               |       |
| Week 2-baseline                    | -4.0(9.0)                                               | -4.0(4.0)                   | -3.2(2.6)                     | 0.766 |
| Month 3-baseline                   | -5.0(9.5)                                               | -4.4(4.0)                   | -4.7(2.5)                     | 0.881 |
| Month 6-baseline                   | -8.8(8.6)                                               | -6.5(5.3)                   | -7.0(4.2)                     | 0.141 |
| RMS of uninvolved wrist flexors    |                                                         |                             |                               |       |
| Week 2-baseline                    | -3.8(7.8)                                               | -3.9(4.9)                   | -3.7(2.9)                     | 0.937 |
| Month 3-baseline                   | -5.6(8.8)                                               | -4.6(4.6)                   | -4.7(3.7)                     | 0.611 |
| Month 6-baseline                   | -8.4(9.5)                                               | -6.9(5.8)                   | -7.0(5.7)                     | 0.263 |
| iEMG of involved wrist extensors   |                                                         |                             |                               |       |
| Week 2-baseline                    | 282.7(335.3)                                            | 159.9(180.7)                | 136.6(74.1)                   | 0.087 |
| Month 3-baseline                   | 444.7(392.6)                                            | 244.4(199.9)                | 186.7(52.6)                   | 0.007 |
| Month 6-baseline                   | 636.1(416.1)                                            | 321.9(256.1)                | 246.2(68.9)                   | 0.000 |
| iEMG of involved wrist flexors     |                                                         |                             |                               |       |
| Week 2-baseline                    | 200.6(254.1)                                            | 155.0(187.1)                | 135.0(81.3)                   | 0.501 |
| Month 3-baseline                   | 308.5(321.7)                                            | 232.7(211.2)                | 185.8(82.6)                   | 0.236 |
| Month 6-baseline                   | 428.4(360.1)                                            | 301.7(263.9)                | 242.8(77.1)                   | 0.096 |
| Cocontraction ratio                |                                                         |                             |                               |       |
| Week 2-baseline                    | -2.7(4.2)                                               | -0.6(1.2)                   | -1.2(2.5)                     | 0.099 |
| Month 3-baseline                   | -3.7(4.6)                                               | -0.9(1.2)                   | -1.5(2.9)                     | 0.000 |
| Month 6-baseline                   | -5.0(5.4)                                               | -1.2(1.3)                   | -1.7(2.7)                     | 0.000 |
| iEMG of uninvolved wrist extensors |                                                         |                             |                               |       |
| Week 2-baseline                    | 3.7(62.2)                                               | 5.2(28.9)                   | 5.0(25.1)                     | 0.997 |
| Month 3-baseline                   | -28.3(92.5)                                             | -25.4(42.9)                 | -25.5(50.4)                   | 0.985 |
| Month 6-baseline                   | -59.3(92.3)                                             | -54.4(56.5)                 | -52.9(51.9)                   | 0.999 |
| iEMG of uninvolved wrist flexors   |                                                         |                             |                               |       |
| Week 2-baseline                    | 4.6(36.4)                                               | 3.2(26.5)                   | 3.9(30.9)                     | 0.943 |
| Month 3-baseline                   | -27.3(77.4)                                             | -24.7(43.0)                 | -24.5(49.7)                   | 0.974 |
| Month 6-baseline                   | -53.3(106.0)                                            | -55.2(52.6)                 | -54.4(44.2)                   | 0.914 |

doi:10.1371/journal.pone.0138608.t002

iEMG of involved wrist extensors and flexors during MIVC of the involved hand in all the children. During MIVC of the involved hand, the improvement shown in the scores of upper extremity functional test was positively correlated with the increase of iEMG in the involved wrist extensors ( $r = 0.301, p = 0.013$ , Fig 6) and flexors ( $r = 0.395, p = 0.001$ , Fig 6) after six months of treatment for all the children. The improvement of grip strength and the increase of



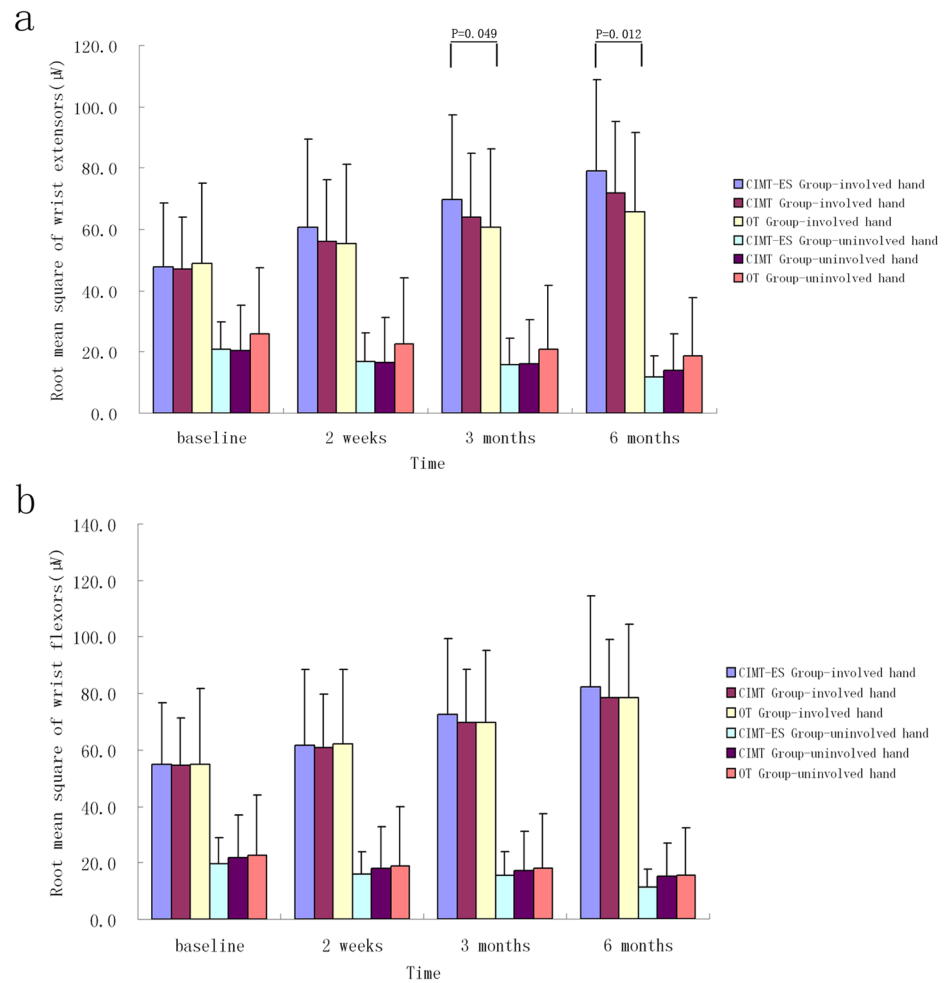

**Fig 3. Changes in root mean square measured in the subjects' wrist extensors (a) and flexors (b) on maximum isometric voluntary contraction of the involved hand (mean ± SD).** CIMT-ES group, constraint-induced movement therapy plus electrical stimulation group; CIMT group, constraint-induced movement therapy group; OT group, occupational therapy group.

doi:10.1371/journal.pone.0138608.g003

iEMG of the involved wrist extensors ( $r = 0.362, p = 0.002$ , Fig 7), obtained with Pearson analysis, was also positively correlated.

## Discussion

The results of this study demonstrated that the use of CIMT plus electrical stimulation, CIMT and traditional OT could strengthen muscle recruitment and coordination of the involved hand, and the bimanual isolated movement control. Pearson's analysis indicated that the global functional improvement of the involved arm and hand was associated strongly with the increase of muscle recruitment. The results also suggest that surface EMG is an effective method in evaluating hand function in children with hemiplegic CP. The CIMT plus electrical stimulation showed a superiority over the CIMT alone and traditional OT, though it might be slightly more expensive and take longer time.

Analysis of covariance was applied to compare the differences of EMG data after treatment among the three groups, excluding the effects caused by the different baseline data among the

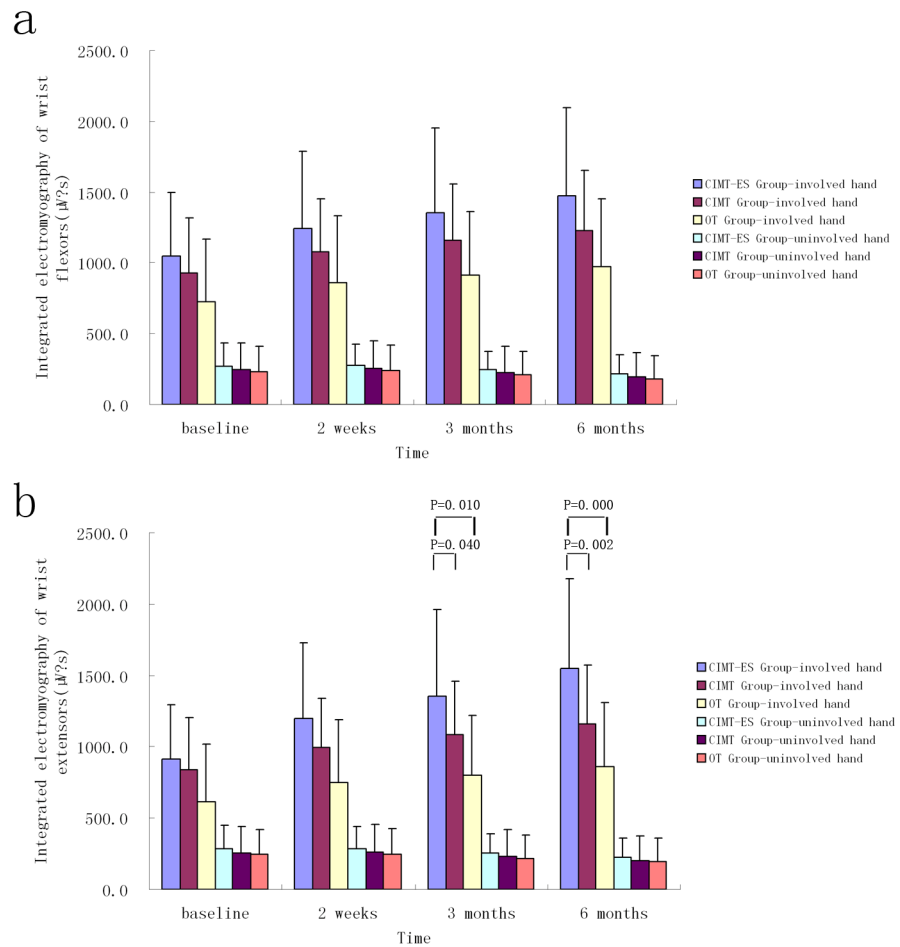

**Fig 4. Changes in integrated electromyography measured in the subjects' wrist flexors (a) and extensors (b) on maximum isometric voluntary contraction of the involved hand (mean ± SD).** CIMT-ES group, constraint-induced movement therapy plus electrical stimulation group; CIMT group, constraint-induced movement therapy group; OT group, occupational therapy group.

doi:10.1371/journal.pone.0138608.g004

three groups. Therefore, any significant change rate among the three groups should be attributed to the different intervention.

Reflecting the surface myoelectric signals changes in time dimension, the RMS is positively correlated with the proportion of type II fibers[27–29]. The results showed that RMS was elevated by all three treatments. Moreover, CIMT plus electrical stimulation showed an improvement in the RMS instead of only OT at 3 and 6 months of treatment. It indicates that CIMT plus electrical stimulation could effectively enhance the synchronization of motor unit recruitment and exciting rhythms. The results suggested that electrical stimulation should be probably an effective potential method to raise the shrunken type II fibers of children with CP.

The iEMG is a reflection of the discharge amount of motor unit participation in activities during a certain period in the muscle, depending on the change of EMG amplitude[27–29]. During MIVC of the involved hand, iEMG of the involved wrist flexors and extensors was obviously improved in all three groups after 2 weeks, 3 and 6 months of treatment. It indicates that CIMT plus electrical stimulation, CIMT and OT can quickly increase the discharge amount of the participating motor unit when the involved wrist flexors and extensors are shortened and remain so till to 6 months after treatment. When the involved hand grasping

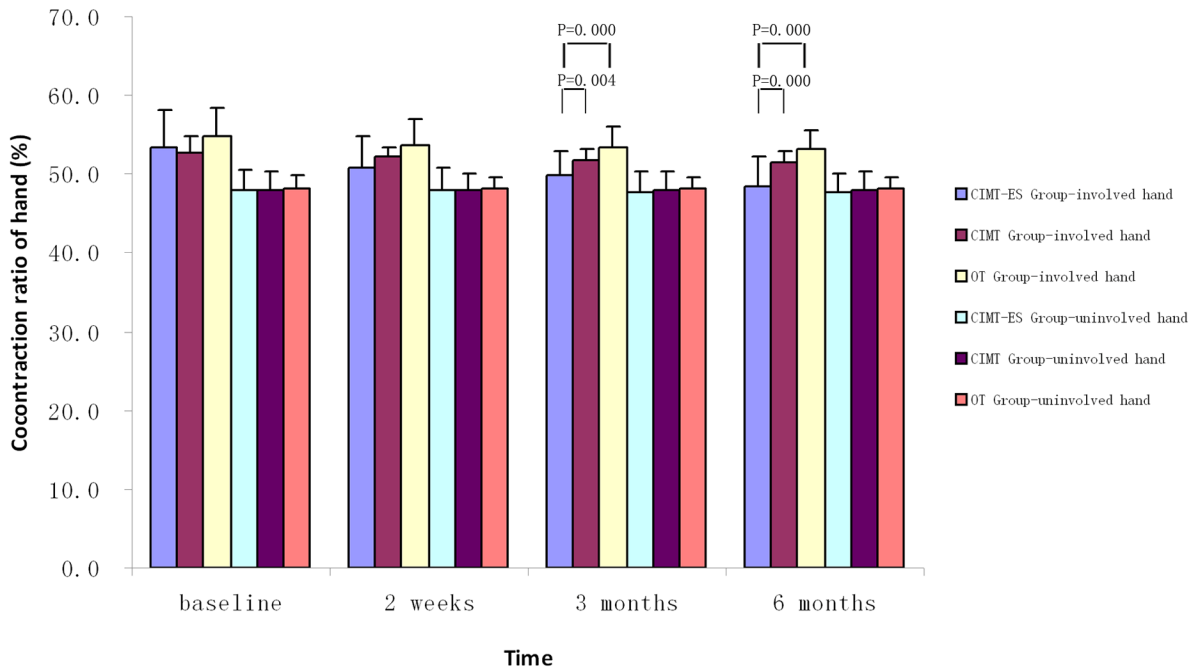

**Fig 5. Changes in cocontraction ratio measured in the subjects' wrist on maximum isometric voluntary contraction of the involved hand and uninvolved hand (mean ± SD).** CIMT-ES group, constraint-induced movement therapy plus electrical stimulation group; CIMT group, constraint-induced movement therapy group; OT group, occupational therapy group.

doi:10.1371/journal.pone.0138608.g005

maximally 6 months after treatment, the iEMG of the uninvolved wrist flexors and extensors decreased significantly, in comparison with those at baseline, which suggested the voluntary movements control capacity of the uninvolved hand was also strengthened. Among the three treatment methods, CIMT plus electrical stimulation showed the greatest improvement in the iEMG of the involved wrist extensors. It was reported that iEMG was positively correlated with muscle strength when muscle shortening occurred[32]. In our study, we also found that the increase of iEMG was positively correlated with the improvement of the grip strength of the involved hand after 6 months of treatment. The improvement of the involved hand function (upper extremity function test) also positively correlated with the increase of iEMG of the involved wrist flexors and extensors during MIVC. It indicates the increase of the motor unit recruitment number and discharge quantity in wrist flexors and extensors is directly related to the overall function of the upper limbs. The findings in our study are consistent with previous observations[19,32,33].

The surface EMG is considered to be an ideal and credible method for the evaluation of CR [30–33]. Excessive cocontraction could impact the performance of motor function. Elder et al [34] reported that the antagonist muscle had higher levels of co-activation in children with CP, suggesting that the agonist muscle was not fully activated. CIMT plus electrical stimulation, CIMT and OT could improve the coordination of the involved wrist in the short term, reduce the ratio of wrist flexors participated in cocontraction, and thereby improve the movement efficiency. Furthermore, CIMT plus electrical stimulation showed superiority in reducing the level of CR in the wrist flexors, maintaining the good position of the wrist muscle force production in children with CP.

Children with hemiplegic CP due to brain damage are usually affected by associated reaction or mirror movements (i.e., the unconscious and uncontrolled movement of one hand that follows the same pattern of the other hand). It impacts bimanual isolated movement control

**Table 3. Change of root mean square (RMS,  $\mu V$ ), integrated electromyography (iEMG,  $\mu V \cdot s$ ) and cocontraction ratio on maximum isometric voluntary contraction of uninvolved hand at two weeks, three and six months: mean (SD).**

| Group                              | Constraint therapy plus electrical stimulation (n = 23) | Constraint therapy (n = 22) | Occupational therapy (n = 23) | P     |
|------------------------------------|---------------------------------------------------------|-----------------------------|-------------------------------|-------|
| RMS of involved wrist extensors    |                                                         |                             |                               |       |
| Week 2-baseline                    | 0.6(14.6)                                               | -0.6(5.4)                   | -0.4(4.8)                     | 0.971 |
| Month 3-baseline                   | -4.3(13.8)                                              | -1.9(6.6)                   | -2.0(5.7)                     | 0.331 |
| Month 6-baseline                   | -6.8(11.6)                                              | -4.7(6.3)                   | -4.1(6.0)                     | 0.156 |
| RMS of involved wrist flexors      |                                                         |                             |                               |       |
| Week 2-baseline                    | 1.9(13.7)                                               | 0.5(6.6)                    | -1.3(3.9)                     | 0.406 |
| Month 3-baseline                   | -3.2(13.3)                                              | -1.5(7.0)                   | -1.9(6.3)                     | 0.891 |
| Month 6-baseline                   | -7.7(11.4)                                              | -5.0(5.5)                   | -4.5(5.4)                     | 0.338 |
| RMS of uninvolved wrist extensors  |                                                         |                             |                               |       |
| Week 2-baseline                    | 0.2(4.5)                                                | 0.3(4.1)                    | 0.2(4.6)                      | 0.999 |
| Month 3-baseline                   | 2.2(6.0)                                                | 2.3(5.4)                    | 2.3(5.5)                      | 0.999 |
| Month 6-baseline                   | 2.9(4.4)                                                | 3.1(6.7)                    | 2.8(6.3)                      | 0.986 |
| RMS of uninvolved wrist flexors    |                                                         |                             |                               |       |
| Week 2-baseline                    | 0.1(4.3)                                                | 0.2(2.0)                    | 0.2(5.0)                      | 0.992 |
| Month 3-baseline                   | 2.2(6.3)                                                | 2.2(7.2)                    | 1.8(6.7)                      | 0.974 |
| Month 6-baseline                   | 3.5(9.3)                                                | 3.5(8.3)                    | 1.8(7.4)                      | 0.752 |
| iEMG of involved wrist extensors   |                                                         |                             |                               |       |
| Week 2-baseline                    | -7.7(113.0)                                             | -8.2(43.4)                  | -2.6(19.9)                    | 0.953 |
| Month 3-baseline                   | -35.6(180.9)                                            | -17.7(79.0)                 | -7.3(42.9)                    | 0.764 |
| Month 6-baseline                   | -88.9(191.3)                                            | -26.7(103.3)                | -15.1(47.7)                   | 0.128 |
| iEMG of involved wrist flexors     |                                                         |                             |                               |       |
| Week 2-baseline                    | -2.8(94.2)                                              | -2.5(33.3)                  | -2.3(18.6)                    | 1.000 |
| Month 3-baseline                   | -15.3(139.3)                                            | -3.8(50.4)                  | -10.7(40.1)                   | 0.953 |
| Month 6-baseline                   | -71.0(181.4)                                            | -36.9(90.8)                 | -18.7(44.8)                   | 0.332 |
| Cocontraction ratio                |                                                         |                             |                               |       |
| Week 2-baseline                    | 0.0(1.6)                                                | 0.0(0.2)                    | 0.0(0.2)                      | 0.979 |
| Month 3-baseline                   | -0.1(1.7)                                               | 0.0(0.9)                    | 0.0(0.5)                      | 0.942 |
| Month 6-baseline                   | -0.2(1.7)                                               | 0.1(0.8)                    | 0.0(0.5)                      | 0.663 |
| iEMG of uninvolved wrist extensors |                                                         |                             |                               |       |
| Week 2-baseline                    | 2.9(95.3)                                               | 3.9(38.4)                   | 2.2(45.8)                     | 0.996 |
| Month 3-baseline                   | 3.7(147.1)                                              | 4.1(74.3)                   | 4.5(56.8)                     | 1.000 |
| Month 6-baseline                   | 7.9(159.8)                                              | 7.6(61.1)                   | 8.0(64.8)                     | 1.000 |
| iEMG of uninvolved wrist flexors   |                                                         |                             |                               |       |
| Week 2-baseline                    | 1.1(80.7)                                               | 1.3(44.1)                   | 1.2(44.1)                     | 1.000 |
| Month 3-baseline                   | 1.9(98.9)                                               | 1.5(39.3)                   | 1.8(59.7)                     | 1.000 |
| Month 6-baseline                   | 7.2(108.4)                                              | 7.0(41.4)                   | 6.9(62.4)                     | 1.000 |

doi:10.1371/journal.pone.0138608.t003

when the hands are required to do different movements (e.g., one hand stabilizing a piece of paper while the other writing)[35]. As represented in Figs 3 and 4, RMS and iEMG of the involved wrist extensors and flexors increased after the treatment whereas those of the uninvolved wrist extensors and flexors decreased. It indicates that bimanual isolated movement control ability might be improved.

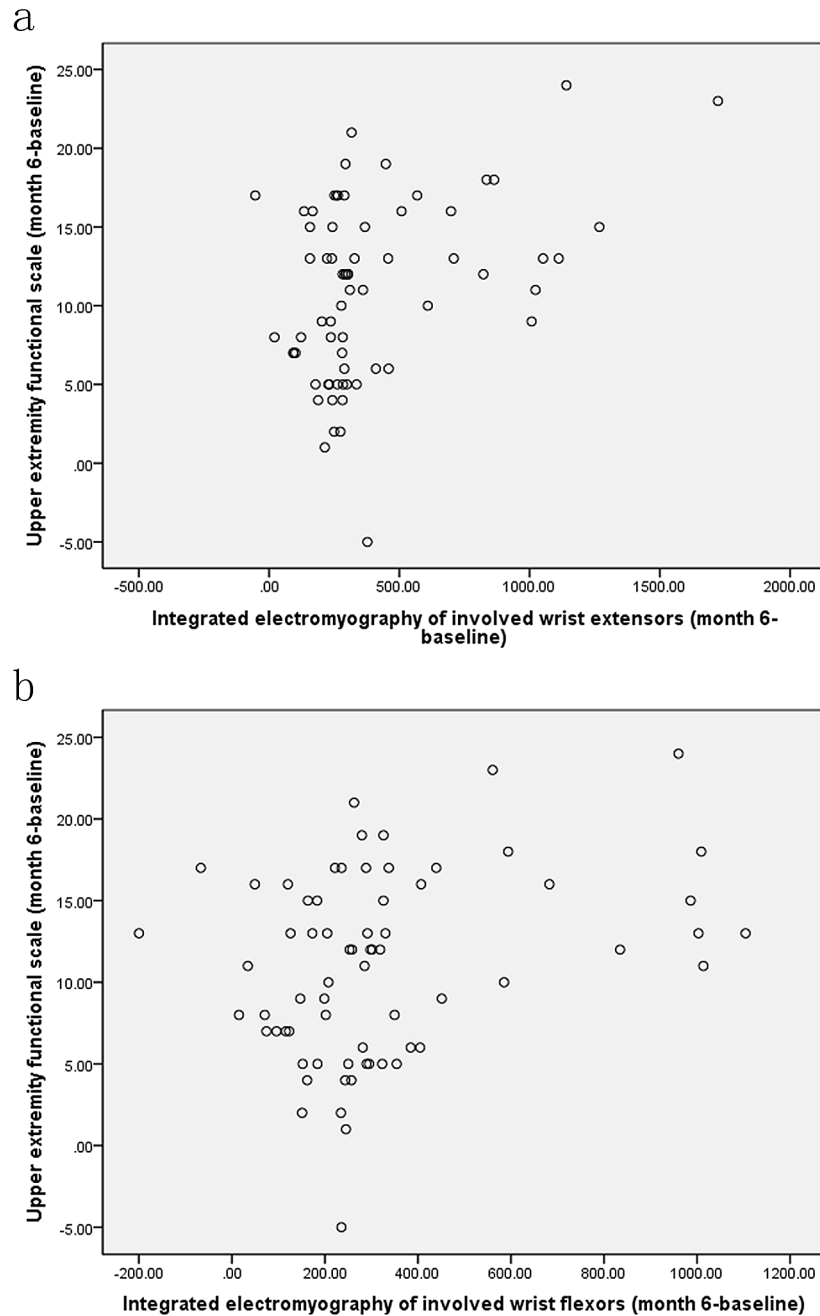

**Fig 6. Simple scatter of changes between upper extremity functional scale scores and integrated electromyography ( $\mu\text{V}\cdot\text{s}$ ) of involved wrist extensors (a) and flexors (b) at six month on maximum isometric voluntary contraction of the involved hand.**

doi:10.1371/journal.pone.0138608.g006

Electrical stimulation induced the wrist extensors contraction of repetition in this study, which would input the sensory information to the brain by the mechanical stimulation. Evidence from this study indicates that electrical stimulation may lead to better response to CIMT. One of the mechanisms may be proposed by the increase of sensory input[10,36–38]. The evidence indicates that electrical stimulation can excite large sensory fibers, predominantly in the A-beta range[10,36]. Through the cutaneous stimulation of muscles, it increases the

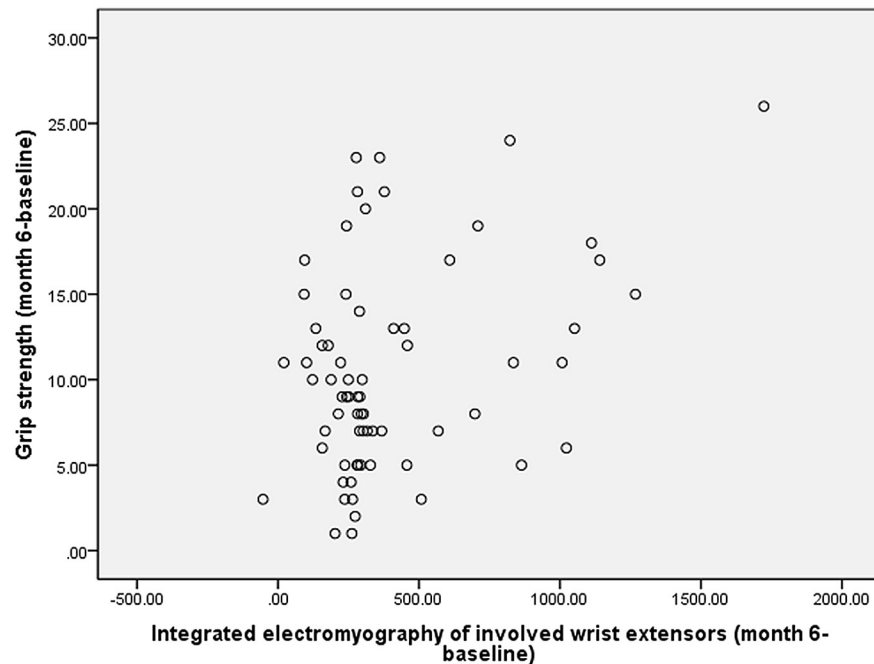

**Fig 7. Simple scatter of changes between grip strength (in mmHg) and integrated electromyography ( $\mu\text{V}\cdot\text{s}$ ) of involved wrist extensors at six month on maximum isometric voluntary contraction of the involved hand.**

doi:10.1371/journal.pone.0138608.g007

excitability of the sensorimotor cortex[37]. Dobkin[38] suggested that the patterned sensory inputs of electrical stimulation should be beneficial to synaptic and biological adaptations within the cortex. Khaslavskaja et al[37] also reported that repeated electrical stimulation could significantly increase motor evoked potentials of the muscle. Another possible mechanism may be that CIMT with electrical stimulation results in a more mature muscle activation pattern by increasing motor unit recruitment and synchronization, selective recruitment of type II fibers (fast twitch, large diameter fibers), and facilitates structural reorganization of brain networks [17,32,34,39–43]. Rose et al[17] found that the muscle strength in children with CP was weakened, suggesting ineffective and incomplete activation. Sutcliffe et al[43] showed that a shift to or persistence of contralateral cortical activity for involved hand movement was important for CIMT mechanism of action. We thus purported that our subjects could gain the most benefits when they practiced CIMT simultaneously with electrical stimulation.

Most of surface myoelectric signals in the uninvolved wrist did not show statistical significant differences in the 3 groups during MIVC, though it seems to indicate that trend. This may be explained by the “ceiling effect” of muscle excitement and “floor effect” of muscle silence in the uninvolved wrist.

### Study limitations

The limitations of this study are as follows: (a) as to the group setting, the present study did not include a single electrical stimulation group since electrical stimulation was not yet well developed in children with CP; (b) this study only focused on the involved hand function. Therefore, it would be much useful to investigate the bimanual hands function using the grasping and visual-motor integration subtests of the Peabody motor developmental scales in the future. (c) some children had to be engaged in interesting activities to distract them from a degree of fear



of electrical stimulation; (d) the potential confounding comorbidity of the participants was not evaluated; (e) the sample size of each group was relatively small. So, it would be high-powered to investigate a greater number of children. Further research is necessary.

## Conclusions

CMIT plus electrical stimulation, CIMT and traditional OT all improve the muscle recruitment and coordination of involved hand and the bimanual isolated movement control ability in children with hemiplegic CP. However, CIMT plus electrical stimulation is the most effective. Muscle recruitment is closely related to the global functional improvement of the involved hand.

## Supporting Information

### S1 CONSORT Checklist.

(DOC)

### S1 Protocol. Trial Protocol in Chinese.

(DOC)

### S2 Protocol. English translation of the original protocol.

(DOC)

## Acknowledgments

We would like to thank the children and their families who participated in our study and contributed time and effort to the success of this project. With their support, we would certainly provide better clinical care to more children like them.

## Author Contributions

Conceived and designed the experiments: KSX LH JNM. Performed the experiments: KSX LH JNM XHY YC. Analyzed the data: KSX LH. Contributed reagents/materials/analysis tools: KSX LH JNM XHY YC. Wrote the paper: KSX.

## References

1. Rosenbaum P, Paneth N, Leviton A, Goldstein M, Bax M, Damiano D, et al. A report: the definition and classification of cerebral palsy April 2006. *Dev Med Child Neurol Suppl.* 2007; 109: 8–14. PMID: [17370477](#)
2. Gorter JW, Rosenbaum PL, Hanna SE, Palisano RJ, Bartlett DJ, Russell DJ, et al. Limb distribution, motor impairment, and functional classification of cerebral palsy. *Dev Med Child Neurol.* 2004; 46: 461–467. PMID: [15230459](#)
3. Eliasson AC, Forssberg H, Hung YC, Gordon AM. Development of hand function and precision grip control in individuals with cerebral palsy: a 13-year follow-up study. *Pediatrics.* 2006; 118: e1226–e1236. PMID: [17015511](#)
4. Steenbergen B, Verrel J, Gordon AM. Motor planning in congenital hemiplegia. *Disabil Rehabil.* 2007; 29: 13–23. PMID: [17364753](#)
5. Janssen L, Steenbergen B. Typical and atypical (cerebral palsy) development of unimanual and bimanual grasp planning. *Res Dev Disabil.* 2011; 32: 963–971. PMID: [21353463](#)
6. Sakzewski L, Ziviani J, Boyd R. Systematic review and meta-analysis of therapeutic management of upper-limb dysfunction in children with congenital hemiplegia. *Pediatrics.* 2009; 123: e1111–e1122. doi: [10.1542/peds.2008-3335](#) PMID: [19451190](#)
7. Sakzewski L, Ziviani J, Boyd R. Efficacy of upper limb therapies for unilateral cerebral palsy: a meta-analysis. *Pediatrics.* 2014; 133: e175–e204. doi: [10.1542/peds.2013-0675](#) PMID: [24366991](#)

8. Chen HC, Chen CL, Kang LJ, Wu CY, Chen FC, Hong WH. Improvement of upper extremity motor control and function after home-based constraint induced therapy in children with unilateral cerebral palsy: immediate and long-term effects. *Arch Phys Med Rehabil.* 2014; 95: 1423–1432. doi: [10.1016/j.apmr.2014.03.025](https://doi.org/10.1016/j.apmr.2014.03.025) PMID: [24742939](https://pubmed.ncbi.nlm.nih.gov/24742939/)
9. Eliasson AC, Shaw K, Berg E, Krumlinde-Sundholm L. An ecological approach of constraint induced movement therapy for 2-3-year-old children: a randomized control trial. *Res Dev Disabil.* 2011; 32: 2820–2828. PMID: [21700416](https://pubmed.ncbi.nlm.nih.gov/21700416/)
10. Laufer Y, Elboim-Gabyzon M. Does sensory transcutaneous electrical stimulation enhance motor recovery following a stroke? A systematic review. *Neurorehabil Neural Repair.* 2011; 25: 799–809. doi: [10.1177/1545968310397205](https://doi.org/10.1177/1545968310397205) PMID: [21746874](https://pubmed.ncbi.nlm.nih.gov/21746874/)
11. Kerr C, McDowell B, McDonough S. Electrical stimulation in cerebral palsy: a review of effects on strength and motor function. *Dev Med Child Neurol.* 2004; 46: 205–213. PMID: [14995090](https://pubmed.ncbi.nlm.nih.gov/14995090/)
12. Wright PA, Granat MH. Therapeutic effects of functional electrical stimulation of the upper limb of eight children with cerebral palsy. *Dev Med Child Neurol.* 2000; 42: 724–727. PMID: [11104342](https://pubmed.ncbi.nlm.nih.gov/11104342/)
13. Barbosa AP, Vaz DV, Gontijo APB, Fonseca ST, Mancini MS. Therapeutic effects of electrical stimulation on manual function of children with cerebral palsy: evaluation of two cases. *Disabil Rehabil.* 2008; 30: 723–728. PMID: [17852326](https://pubmed.ncbi.nlm.nih.gov/17852326/)
14. Carmick J. use of neuromuscular electrical stimulation and [corrected] dorsal wrist splint to improve the hand function of a child with spastic hemiparesis. *Phys Ther.* 1997; 77: 661–671. PMID: [9184690](https://pubmed.ncbi.nlm.nih.gov/9184690/)
15. Xu K, Wang L, Mai J, He L. Efficacy of constraint-induced movement therapy and electrical stimulation on hand function of children with hemiplegic cerebral palsy: a controlled clinical trial. *Disabil Rehabil.* 2012; 34: 337–346. doi: [10.3109/09638288.2011.607213](https://doi.org/10.3109/09638288.2011.607213) PMID: [21961441](https://pubmed.ncbi.nlm.nih.gov/21961441/)
16. Doix AC, Gulliksen A, Brændvik SM, Roeleveld K. Fatigue and muscle activation during submaximal elbow flexion in children with cerebral palsy. *J Electromyogr Kinesiol.* 2013; 23: 721–726. doi: [10.1016/j.jelekin.2012.12.005](https://doi.org/10.1016/j.jelekin.2012.12.005) PMID: [23375713](https://pubmed.ncbi.nlm.nih.gov/23375713/)
17. Rose J, McGill KC. Neuromuscular activation and motor-unit firing characteristics in cerebral palsy. *Dev Med Child Neurol.* 2005; 47: 329–336. PMID: [15892375](https://pubmed.ncbi.nlm.nih.gov/15892375/)
18. Braendvik SM, Roeleveld K. The role of co-activation in strength and force modulation in the elbow of children with unilateral cerebral palsy. *J Electromyogr Kinesiol.* 2012; 22: 137–144. doi: [10.1016/j.jelekin.2011.10.002](https://doi.org/10.1016/j.jelekin.2011.10.002) PMID: [22071153](https://pubmed.ncbi.nlm.nih.gov/22071153/)
19. Stearns GE, Burtner P, Keenan KM, Qualls C, Phillips J. Effects of constraint-induced movement therapy on hand skills and muscle recruitment of children with spastic hemiplegic cerebral palsy. *NeuroRehabilitation.* 2009; 24: 95–108. doi: [10.3233/NRE-2009-0459](https://doi.org/10.3233/NRE-2009-0459) PMID: [19339749](https://pubmed.ncbi.nlm.nih.gov/19339749/)
20. Dunn W. grip-strength of children aged 3 to 7 years using a modified sphygmomanometer: comparison of typical children and children with rheumatic disorders. *Am J Occup Ther.* 1993; 47: 421–428. PMID: [8498466](https://pubmed.ncbi.nlm.nih.gov/8498466/)
21. Poole JL, Burtner PA, Torres TA, McMullen CK, Markham A, Marcum ML, et al. Measuring dexterity in children using the nine-hole peg test. *J Hand Ther.* 2005; 18: 348–351. PMID: [16059856](https://pubmed.ncbi.nlm.nih.gov/16059856/)
22. Carroll D. A quantitative test of upper extremity function. *J chron Dis.* 1965; 18: 479–491. PMID: [14293031](https://pubmed.ncbi.nlm.nih.gov/14293031/)
23. Van Hartingsveldt MJ, Cup EH, Oostendorp RA. Reliability and validity of the fine motor scale of the Peabody Developmental Motor Scales-2. *Occup Ther Int.* 2005; 12: 1–13. PMID: [15962696](https://pubmed.ncbi.nlm.nih.gov/15962696/)
24. DeLuca SC, Echols K, Rameyand SL, Taub E. Pediatric constraint-induced movement therapy for a young child with cerebral palsy: two episodes of care. *Phys Ther.* 2003; 83: 1003–1013. PMID: [14577827](https://pubmed.ncbi.nlm.nih.gov/14577827/)
25. Zhang ZX, Zuo QH, Lei ZW, Chen RH, Huang LB, He GZ, et al. Re-standardization of social life ability scale for Chinese infant-junior school student. *Chin J Clin Psychol.* 1995; 3: 12–15.
26. Jensen CV. A computer program for randomizing patients with near-even distribution of important parameters. *Comput Biomed Res.* 1991; 24: 429–434. PMID: [1743004](https://pubmed.ncbi.nlm.nih.gov/1743004/)
27. Ahmad Nadzri AA, Ahmad SA, Marhaban MH, Jaafar H. Characterization of surface electromyography using time domain features for determining hand motion and stages of contraction. *Australas Phys Eng Sci Med.* 2014; 37: 133–137. doi: [10.1007/s13246-014-0243-3](https://doi.org/10.1007/s13246-014-0243-3) PMID: [24443218](https://pubmed.ncbi.nlm.nih.gov/24443218/)
28. Criswell E. Cram's introduction to surface electromyography. 2nd ed. Massachusetts: Jones and Bartlett publishers; 2011.
29. Duchêne J, Goubel F. Surface electromyogram during voluntary contraction: processing tools and relation to physiological events. *Crit Rev Biomed Eng.* 1993; 21: 313–397. PMID: [8243094](https://pubmed.ncbi.nlm.nih.gov/8243094/)
30. Hammond MC, Fitts SS, Kraft GH, Nutter PB, Trotter MJ, Robinson LM. Co-contraction in the hemiparetic forearm: quantitative EMG evaluation. *Arch Phys Med Rehabil.* 1988; 69: 348–351. PMID: [3365115](https://pubmed.ncbi.nlm.nih.gov/3365115/)

31. Ikeda AJ, Abel MF, Granata KP, Damiano DL. Quantification of cocontraction in spastic cerebral palsy. *Electromyogr Clin Neurophysiol*. 1998; 38: 497–504. PMID: [9842485](#)
32. Damiano DL, Martellotta TL, Sullivan DJ, Granata KP, Abel MF. Muscle force production and functional performance in spastic cerebral palsy: relationship of cocontraction. *Arch Phys Med Rehabil*. 2000. 81: 895–900. PMID: [10896001](#)
33. Hug F. Can muscle coordination be precisely studied by surface electromyography? *J Electromyogr Kinesiol*. 2011; 21: 1–12. doi: [10.1016/j.jelekin.2010.08.009](#) PMID: [20869882](#)
34. Elder GC, Kirk J, Stewart G, Cook K, Weir D, Marshall A, et al. Contributing factors to muscle weakness in children with cerebral palsy. *Dev Med Child Neurol*. 2003; 45: 542–550. PMID: [12882533](#)
35. Kuhtz-Buschbeck JP, Sundholm LK, Eliasson AC, Forssberg H. Quantitative assessment of mirror movements in children and adolescents with hemiplegic cerebral palsy. *Dev Med Child Neurol*. 2000; 42: 728–736. PMID: [11104343](#)
36. Levin MF, Hui-Chan CWY. Conventional and acupuncturelike transcutaneous electrical nerve stimulation excite similar afferent fibres. *Arch Phys Med Rehabil*. 1993; 74: 54–60. PMID: [8420521](#)
37. Khaslavskaja S, Ladouceur M, Sinkjaer T. Increase in tibialis anterior motor cortex excitability following repetitive electrical stimulation of the common peroneal nerve. *Exp Brain Res*. 2002; 145: 309–315. PMID: [12136380](#)
38. Dobkin BH. Do electrically stimulated sensoru inputs and movements lead to long-term plasticity and rehabilitation gains? *Cur Opin Neuro*. 2003; 16: 685–691.
39. Ito J, Araki A, Tanaka H, Tasaki T, Cho K, Yanazaki R. Muscle histopathology in spastic cerebral palsy. *Brain Devel*. 1996; 18: 299–303.
40. Frontera WR, Grimby L, Larsson L. Firing rate of the lower motoneuron and contractile properties of its muscle fibers after upper motoneuron lesion in man. *Muscle Nerve*. 1997; 20: 938–947. PMID: [9236783](#)
41. Farmer SF, Swash M, Ingram DA, Stephens JA. Changes in motor unit synchronization following central nervous lesions in man. *J Physiol*. 1993; 463: 83–105. PMID: [8246205](#)
42. Barrett RS, Barber L. Impaired muscle growth in spastic cerebral palsy. *Dev Med Child Neurol*. 2013; 55: 202. doi: [10.1111/dmcn.12073](#) PMID: [23294400](#)
43. Sutcliffe TL, Logan WJ, Fehlings DL. Pediatric constraint-induced movement therapy is associated with increased contralateral cortical activity on functional magnetic resonance imaging. *J Child Neurol*. 2009; 24: 1230–1235. doi: [10.1177/0883073809341268](#) PMID: [19805822](#)
